1 **Discrimination of species within the *Enterobacter cloacae* complex using MALDI-**  
2 **TOF Mass Spectrometry and Fourier-Transform Infrared Spectroscopy coupled**  
3 **with Machine Learning tools**

4 **Ana Candela<sup>1\*</sup>, Miriam Mateos<sup>2\*</sup>, Alicia Gómez-Asenjo<sup>1</sup>, Manuel J. Arroyo<sup>3</sup>, Marta**  
5 **Hernandez-García<sup>2,4</sup>, Rosa del Campo<sup>2,4</sup>, Emilia Cercenado<sup>1,5,6</sup>, Gema Méndez<sup>3</sup>,**  
6 **Luis Mancera<sup>3</sup>, Juan de Dios Caballero<sup>2,4</sup>, Laura Martínez-García<sup>2,7</sup>, Desirée**  
7 **Gijón<sup>2,4</sup>, María Isabel Morosini<sup>2,4</sup>, Patricia Ruiz-Garbajosa<sup>2,4</sup>, Rafael Cantón<sup>2,4</sup>,**  
8 **Patricia Muñoz<sup>1,5,6</sup>, David Rodríguez-Temporal<sup>1†</sup> and Belén Rodríguez-Sánchez<sup>1</sup>.**

9 <sup>1</sup>Clinical Microbiology and Infectious Diseases Department, Hospital General  
10 Universitario Gregorio Marañón, Madrid, Spain and Institute of Health Research  
11 Gregorio Marañón (IiSGM), Madrid, Spain

12 <sup>2</sup>Servicio de Microbiología. Hospital Universitario Ramón y Cajal and Instituto Ramón y  
13 Cajal de Investigación Sanitaria (IRYCIS), Madrid, Spain.

14 <sup>3</sup>Clover Bioanalytical Software, Av. del Conocimiento, 41, 18016 Granada, Spain

15 <sup>4</sup>CIBER en Enfermedades Infecciosas, Madrid, Spain

16 <sup>5</sup>CIBER de Enfermedades Respiratorias (CIBERES CB06/06/0058), Madrid, Spain.

17 <sup>6</sup>Medicine Department, Faculty of Medicine, Universidad Complutense de Madrid,  
18 Madrid, Spain

19 <sup>7</sup>Centro de Investigación Biomédica en Red de Epidemiología y Salud Pública  
20 (CIBERESP), Madrid, Spain.

21 **Running Title:** *E. cloacae* complex analysis with MALDI-TOF MS and FTIR S

22 **Corresponding Author:**

23 David Rodríguez-Temporal, PhD.

24 Servicio de Microbiología Clínica y Enfermedades Infecciosas. Hospital General  
25 Universitario Gregorio Marañón. Dr. Esquerdo 46. 28007 Madrid, Spain

26 Phone: +34- 91- 426 7163, Fax: +34- 91- 426 9595

27 E-mail: [david.rodriquez@iisgm.com](mailto:david.rodriquez@iisgm.com)

28 \*These authors contributed equally to the study

29 **ABSTRACT**

30 *Enterobacter cloacae* complex (ECC) encompasses heterogenic genetic clusters of  
31 species that have been associated with nosocomial outbreaks. These species may  
32 host different acquired antimicrobial susceptibility patterns and their identification is  
33 challenging. DNA-based techniques are laborious and require specific equipment.  
34 MALDI-TOF MS has showed low accuracy for the discrimination of ECC species. The  
35 aim of this study is to develop machine learning predictive models using MALDI-TOF  
36 MS and new diagnostic technologies like Fourier-Transform Infrared Spectroscopy  
37 (FTIR-S) for species-level identification of these species.

38 A total of 163 ECC clinical isolates were included in the study: 47 for the predictive  
39 model development and internal validation and 126 for external validation. All spectra  
40 obtained by MALDI-TOF MS and FTIR-S were processed using Clover MS Data  
41 Analysis software. Two models were created: Model A for differentiate six ECC species  
42 and Model B for *E. hormaechei* subspecies.

43 For MALDI-TOF MS spectra, Model A identified correctly 96.0% of isolates using  
44 Random Forest (RF) algorithm, and Model B identified 94.1% using Support Vector  
45 Machine (SVM). Regarding FTIR-S, Model A identified 73.0% of isolates by RF and  
46 Model B 72.5%. Two new predictive models were created for FTIR-S: Model C for  
47 discrimination of *E. hormaechei* from non-*E. hormaechei* (87.3% identification, RF) and  
48 Model D for differentiation among non-*E. hormaechei* species (62.7% identification,  
49 RF).

50 MALDI-TOF MS combined with machine learning tools could be a rapid and accurate  
51 method for species-level identification within the ECC. FTIR-S differentiated general  
52 groups of the ECC although discrimination of non-*E. hormaechei* species was poor.

53

54

## 55 INTRODUCTION

56 *Enterobacter* spp. is a facultative anaerobic Gram-negative genus that can be found as  
57 a natural commensal in the gut microbiome of mammals (1). Several species have  
58 been associated with nosocomial outbreaks causing urinary tract infection, skin and  
59 soft tissues infection, pneumonia and bacteraemia (2, 3). *Enterobacter cloacae*  
60 complex (ECC) is of particular clinical interest. This group is composed of 13  
61 heterogenic genetic clusters according to *hsp60* gene sequencing: *E. asburiae* (cluster  
62 I), *E. kobei* (cluster II), *E. hormaechei* subsp. *hoffmannii* (cluster III), *E. roggkampii*  
63 (cluster IV), *E. ludwigii* (cluster V), *E. hormaechei* subsp. *oharae* and subsp.  
64 *xiangfangensis* (cluster VI), *E. hormaechei* subsp. *hormaechei* (cluster VII), *E.*  
65 *hormaechei* subsp. *steigerwaltii* (cluster VIII), *E. bugandensis* (cluster IX), *E.*  
66 *nimipressuralis* (cluster X), *E. cloacae* subsp. *cloacae* (cluster XI), *E. cloacae* subsp.  
67 *dissolvens* (cluster XII) and an heterogeneous group of *E. cloacae* sequences  
68 considered as cluster XIII. However, the taxonomy of this genus is still under debate (4,  
69 5). In fact, *E. aerogenes* has been recently reclassified into the *Klebsiella* genus as *K.*  
70 *aerogenes* (6). A more comprehensive study based on whole genome sequencing  
71 (WGS) data from ECC isolates yielded a redistribution of the species defined by *hsp60*  
72 sequencing (5) into 22 clades (7) and allowed the characterization of new ECC species  
73 (8).

74 Discrimination of the ECC at the species level is usually performed by DNA-based  
75 methods. The most commonly targeted gene is *hsp60*, although multilocus sequence  
76 analysis (MLSA) and WGS have also been applied (5, 9, 10). DNA-based diagnostic  
77 methods techniques are laborious and require specific equipment. Therefore, new  
78 emerging techniques such as MALDI-TOF MS (Matrix Assisted Laser  
79 Desorption/Ionization Time-of-flight Mass Spectrometry) have been proposed as an  
80 alternative to molecular methods. MALDI-TOF MS has shown to be an excellent  
81 methodology for bacterial identification. It can easily identify *E. cloacae* complex

82 isolates but it showed low discrimination power for the species in this group when using  
83 standard analysis (11, 12).

84 Fourier-Transform Infrared Spectroscopy (FTIR-S) has also emerged recently as a  
85 rapid method for bacterial typing (13), although there are still few studies for the  
86 discrimination of close-related species. These new technologies, coupled to a machine  
87 learning approach has a great potential for fast and cost-effective bacterial typing and  
88 discrimination of closely related species.

89 The aim of this study is to develop and validate prediction models for the  
90 differentiation of the species within the ECC using MALDI-TOF MS and FTIR-S spectra  
91 combined with machine learning tools. This task is important because of their diverse  
92 implications in human pathologies and their involvement in nosocomial outbreaks (4).  
93 Besides, *E. hormaechei*, the most commonly encountered ECC species in the clinical  
94 settings, has been correlated with enhanced acquisition of antimicrobial resistance  
95 mechanisms and the expression of virulence factors (14-16).

96

## 97 **MATERIALS AND METHODS**

### 98 **Bacterial isolates**

99 Overall, 163 clinical isolates belonging to the ECC and nine *K. aerogenes* (formerly *E.*  
100 *aerogenes*) were analysed. They belonged to a surveillance study of antimicrobial  
101 resistances were collected at the Hospital Universitario Ramón y Cajal (Madrid, Spain)  
102 between 2005 and 2018 and identified by partial sequencing of the *hsp60* gene (17).  
103 All the analysed isolates host different carbapenemases.

104 All isolates were incubated overnight at 37°C and metabolically activated after  
105 three subcultures on Columbia Blood Agar (bioMérieux, Marcy l'Etoile, France).

106 Isolates were analysed with MALDI-TOF MS and FTIR-S at the Hospital General  
107 Universitario Gregorio Marañón (Madrid, Spain).

### 108 **Bacterial identification and spectra acquisition using MALDI-TOF MS**

109 Identification was performed using the MBT Smart MALDI Biotyper (Bruker Daltonics,  
110 Bremen, Germany). All strains were spotted in duplicate onto the MALDI target plate  
111 and overlaid with 1 µl of 70% formic acid. After drying at room temperature, spots were  
112 covered with 1 µl HCCA matrix, prepared according to the manufacturer's indications  
113 (Bruker Daltonics) and allowed to dry. Two spectra in the range of 2,000-20,000 Da  
114 were obtained on each spot, resulting in 4 spectra per isolate.

### 115 **Spectra acquisition using Fourier-Transform Infrared Spectroscopy**

116 All strains were also analysed by FTIR-S using an IR Biotyper (Bruker Daltonics)  
117 according to the manufacturer's instructions. The procedure consisted on the  
118 resuspension of a 1 µl loopful of bacteria in 50 µl of 70% ethanol. After a brief vortexing  
119 step, 50 µl of sterile water were added and the mixture was vortexed again. Then, 15 µl  
120 of this preparation were transferred onto the 96-well silicon plate and allowed to dry at  
121 40°C for 20 minutes approximately. Each isolate was analysed in triplicates -technical  
122 replicates- and two standards (Bruker Infrared Test Standard 1 and 2, Bruker  
123 Daltonics) were included in each run and only spectra with valid target quality controls  
124 were further analysed.

### 125 **Data processing of MALDI-TOF MS protein spectra and development of** 126 **predictive models**

127 After spectra acquisition, 47 isolates representing all *Enterobacter* species were used  
128 as a test set for the evaluation of the predictive model for species differentiation (Table  
129 1). MALDI-TOF MS protein spectra were processed with Clover MS Data Analysis  
130 software (Clover Biosoft, Granada, Spain). A pre-processing pipeline was applied to

131 the MALDI-TOF MS spectra that consisted of: 1) smoothing (Savitzky-Golay Filter:  
132 window length=11; polynomial order=3) and baseline subtraction (Top-Hat filter  
133 method with factor=0.02); 2) creation of an average spectrum per isolate; 3) alignment  
134 of average spectra from different isolates (shift: medium; constant tolerance: 2 Da;  
135 linear mass tolerance: 600 ppm); 4) normalization by Total Ion Current (TIC).

136 The processed spectra were included in two peak matrices used to develop two  
137 predictive models: 1) Model A, aiming for the differentiation of the 6 main species -*E.*  
138 *asburiae* (cluster I), *E. kobei* (cluster II), *E. hormaechei* (clusters III, VI and VIII  
139 considered together), *E. roggkampii* (cluster IV), *E. ludwigii* (cluster V) and *E.*  
140 *cloacae* subsp. *dissolvens* (cluster XII)- and 2) Model B, for the differentiation of the  
141 three *E. hormaechei* clusters (Figure 1). These two peak matrices were used as input  
142 data for three machine learning algorithms: Partial Least Square-Discriminant Analysis  
143 (PLS-DA), Support Vector Machine (SVM) and Random Forest (RF). Internal k-fold  
144 cross validation using k=10 was performed.

#### 145 **Data processing of FTIR-S spectra and development of predictive models**

146 Following the same approach applied for the analysis of the *Enterobacter* isolates with  
147 MALDI-TOF MS, the same group of 47 isolates was used as test set for the creation of  
148 a predictive model based on FTIR-S spectra. For this purpose, each isolate was  
149 analysed in triplicates - technical replicates - in two consecutive days - biological  
150 replicates -. Therefore, the total number of spectra per isolate was six. The spectra  
151 were processed using Clover MS Data Analysis with the following pipeline: 1) Standard  
152 Normal Variation; 2) Smoothing (Savitzky-Golay Filter: window length=9; polynomial  
153 order=2; second derivative); 3) Maximum absorbance normalization.

154 As for MALDI-TOF MS spectra analysis, discrimination of the six major ECC  
155 species was attempted, as well as differentiation of the three *E. hormaechei* clusters.

156 For this purpose, the algorithms SVM and RF were also applied using internal k-fold  
157 cross validation of k=10.

### 158 **Classification of the *E. cloacae* complex isolates using the developed models for** 159 **MALDI-TOF MS spectra**

160 MALDI-TOF MS spectra from the external validation set (n=126) were processed using  
161 the pipeline described above and blindly classified by the predictive models using  
162 Clover MS Data Analysis software.

### 163 **Classification of the *E. cloacae* complex isolates using the developed model for** 164 **FTIR-S spectra**

165 FTIR-S spectra from the external validation set (n=126) were processed using the  
166 pipeline described above and blindly classified by the predictive models using Clover  
167 MS Data Analysis software.

### 168 **Ethics statement**

169 The Ethics Committee of the Gregorio Marañón Hospital (CEIm) evaluated this project  
170 and considered that all the conditions for waiving informed consent were met, since the  
171 study was conducted with microbiological samples and not with human products.

172

## 173 **RESULTS**

### 174 **MALDI-TOF MS predictive models**

175 Different models were developed by the implementation of the available algorithms  
176 (PLS-DA, SVM and RF) to the test set. These models were validated internally by  
177 cross-validation (k-fold=10) and externally by the automatic classification of the 126  
178 protein spectra included in the validation set (Table 1). For Model A evaluation,  
179 Random Forest (RF) yielded the highest rates of correct classification for the most



180 common *Enterobacter* species (Model A): 95.7% and 96.0% for internal and external  
181 validation, respectively (Table 2). The RF plot for internal validation is showed in Figure  
182 2. Only 5/126 isolates were misidentified by Model A using RF (Table S1): *E.*  
183 *hormaechei* identified as *E. roggenkampii* (n=1), *E. roggenkampii* identified as *E.*  
184 *hormaechei* (n=2), *E. roggenkampii* identified as *E. kobei* (n=1) and *E. kobei* identified  
185 as *E. roggenkampii* (n=1). PLS-DA and SVM algorithms also provided high rates of  
186 correct classification in the internal validation although PLS-DA showed lower  
187 discriminative power in the external validation (70.6%) -Table 2-.

188         Regarding Model B, designed to differentiate *E. hormaechei* clusters III, VI and  
189 VIII, the implementation of PLS-DA yielded 77.8% correct classification in the internal  
190 validation (Table 2). Thus, this model was not considered suitable for external  
191 validation. However, SVM provided a correct classification of 94.4% and 94.1% of the  
192 isolates in the internal and external validation, respectively (Tables S2-S3). Three *E.*  
193 *hormaechei* isolates out of 51 were misidentified: one strain from cluster VIII was  
194 identified as cluster VI, and two strains from cluster VI were identified as cluster VIII. All  
195 cluster III strains were correctly classified (Table S3). Besides, RF algorithm reached  
196 94.4% of correct classification (Figure 3) and allowed species-level identification of  
197 80.4% of the isolates from the validation set (Table S4).

## 198 **FTIR-S predictive models**

199 The implementation of FTIR-S allowed the development of classification models based  
200 on SVM and RF. Internal cross-validation (k=10) and external validation of Model A  
201 using RF reached 98.5% (Table S5) and 73.0% correct classification, respectively. The  
202 rate of accuracy yielded by SVM was lower in both internal and external validation  
203 (Table 3). For Model B, correct discrimination of the *E. hormaechei* clusters was  
204 achieved in 100% and 72.5% of the cases in the internal and external validation,  
205 respectively. In that model, also SVM obtained lower identification rates.

206           Due to the low percentages of correct classification obtained in the external  
207 validation of Model A and Model B, two more predictive models were evaluated for  
208 FTIR-S spectra: 1) Model C: for the differentiation of *E. hormaechei* vs non-*E.*  
209 *hormaechei* isolates; 2) Model D: for discrimination among non-*E. hormaechei* species.  
210 Applying RF algorithm, Model C and D reached 99.1% and 99.0% correct classification  
211 of the isolates in the internal validation and 87.3% and 62.7% in the external validation,  
212 respectively (Table 4).

213

## 214 **DISCUSSION**

215 In this study, the implementation of classifying algorithms to MALDI-TOF spectra  
216 allowed the correct species assignment of 96.0% isolates belonging to the main ECC  
217 species and 94.1% of the *E. hormaechei* clusters III, VI and VIII. On the other hand, the  
218 discrimination power of FTIR S for the same categories was 73.0% and 72.5% and in  
219 87.3% of the cases this technology discriminated correctly between *E. hormaechei* and  
220 non-*E. hormaechei* isolates.

221           Poor discrimination of *E. cloacae* complex species by MALDI-TOF MS has been  
222 previously reported either by using commercial (11, 17) and enriched, in-house  
223 databases (18). However, a recent study from a research group with extensive  
224 experience in MALDI-TOF MS and the creation of expanded libraries reported 92.0%  
225 correct species-level identification by implementing a specific in-house library enriched  
226 with well-characterized ECC strains and correct discrimination of 97.0% *E. hormaechei*  
227 isolates (19). This approach can be useful for discrimination of close-related species  
228 but the construction of a database is cumbersome and requires highly trained  
229 personnel.

230           A more rapid approach for the discrimination of ECC species is the  
231 implementation of classification models. A previous study already demonstrated that

232 the application of hierarchical clustering to protein spectra provided a clear  
233 discrimination of *E. hormaechei* isolates (clusters III, VI and VIII) from the rest of the  
234 species from the complex in the study developed by Wang et al. (18).

235 In this study, different supervised algorithms were implemented for the  
236 discrimination of six main ECC species and for differentiation of the three *E.*  
237 *hormaechei* clusters (III, VI and VIII). For MALDI-TOF MS spectra, RF algorithm  
238 showed highest discrimination capacity both in the cross-validation (95.7%) and in the  
239 external validation of the model (96.0%) and SVM demonstrated a high suitability for  
240 the differentiation of the *E. hormaechei* clusters (94.4% correct classification in the  
241 cross-validation and 94.1% in the external validation). Although a lower specificity in  
242 the classification of *E. hormaechei* subspecies was found, the two developed models  
243 have shown high discrimination between species of the ECC. Therefore, MALDI-TOF  
244 MS combined with machine learning tools could be a rapid and accurate method for  
245 species-level identification within the ECC. Only five (3.9%) isolates from the main  
246 species and three (5.8%) from the *E. hormaechei* clusters were misclassified, which  
247 shows the high specificity of this methodology.

248 The implementation of FTIR-S and RF modelling allowed the correct  
249 classification of 98.5% -cross-validation- and 73.0% -external validation- of the spectra  
250 from the main species and 100% and 72.5% of the *E. hormaechei* clusters. The low  
251 rate of correct classifications encouraged us to developed different models for the  
252 discrimination of *E. hormaechei* isolates from the rest of the ECC species. In this case,  
253 99.1% and 87.3% correct classifications were achieved in the cross-validation and the  
254 external validation, respectively. Discrimination of non-*E. hormaechei* species was low  
255 using RF (62.7%) and even lower with SVM. Our hypothesis is that FTIR-S accuracy is  
256 so high that it may discriminate the analysed isolates based on their sequence type or  
257 their genetic lineage since this methodology is designed mainly for bacterial typing.

258 Unfortunately, the strains of this study were not characterized at that level. This  
259 approach has been previously observed in the study by Vogt et al. (20).

260 One of the limitations of this study was the fact that all isolates host  
261 carbapenemases because they source from a previously analysed collection (17).  
262 Although this feature does not hamper the results from the present work, further  
263 studies will be performed including both resistant and susceptible isolates.

264 Although further algorithms and modelling is needed in order to implement  
265 FTIR-S for the discrimination of *E. cloacae* complex species, MALDI-TOF MS has  
266 demonstrated to be a rapid and cost-effective method for this task. The use of spectra  
267 analysis tools is becoming user-friendly and easy to apply and its use may provide  
268 species-level identification in a fast and inexpensive way.

269

## 270 **ACKNOWLEDGMENTS**

271 This work was supported by the projects PI15/01073 and PI18/00997 from the Health  
272 Research Fund (FIS. Instituto de Salud Carlos III. Plan Nacional de I+D+I 2013-2016)  
273 of the Carlos III Health Institute (ISCIII, Madrid, Spain) partially financed by the  
274 European Regional Development Fund (FEDER) 'A way of making Europe'.

275 MM was funded by the Community of Madrid (Programa de Garantía Juvenil, PEJD-  
276 2017-PRE/BMD-5106) and DRT with a postdoc contract from the Intramural Funding  
277 Program of the IISGM. BRS (CPII19/00002) is a recipient of a Miguel Servet contract  
278 supported by the FIS.

279

## 280 **AUTHOR CONTRIBUTIONS**

281 Ana Candela: experimental part, formal analysis, data collection, validation,  
282 visualization, writing – original draft preparation and review/editing. Miriam Mateos and

283 Alicia Gómez-Asenjo: experimental part, formal analysis and data collection. Manuel J.  
284 Arroyo, Gema Méndez, and Luis Mancera: data analysis, validation, writing – original  
285 draft preparation and review/editing. Marta Hernández-García, Rosa del Campo:  
286 experimental part, formal analysis and writing, submission of isolates, original draft  
287 preparation and review/editing. Juan de Dios Caballero, Laura Martínez-García,  
288 Desirée Gijón, María Isabel Morosini, Patricia Ruiz-Garbajosa, Rafael Cantón and  
289 Patricia Muñoz: validation, writing and review/editing. Emilia Cercenado:  
290 conceptualization, formal analysis, validation, writing and review/editing. David  
291 Rodríguez-Temporal: conceptualization, formal analysis, validation, original draft  
292 preparation and review/editing; Belén Rodríguez-Sánchez: conceptualization, project  
293 administration, formal analysis, supervision, validation, visualization, original draft  
294 preparation and review/ editing.

## 295 **FIGURE LEGENDS**

296 **Figure 1.** *E. cloacae* complex identification algorithm according to models developed.

297 **Figure 2.** MALDI-TOF MS spectra in Random Forest distance plot for Model A.

298 **Figure 3.** MALDI-TOF MS spectra in Random Forest distance plot for Model B.

299

300

301

302

303

304

305

306

## 307 REFERENCES

- 308 1. Mezzatesta ML, Gona F, Stefani S. 2012. Enterobacter cloacae complex: clinical impact  
309 and emerging antibiotic resistance. *Future Microbiol* 7:887-902.
- 310 2. Akbari M, Bakhshi B, Najar Peerayeh S. 2016. Particular Distribution of Enterobacter  
311 cloacae Strains Isolated from Urinary Tract Infection within Clonal Complexes. *Iran*  
312 *Biomed J* 20:49-55.
- 313 3. Kremer A, Hoffmann H. 2012. Prevalences of the Enterobacter cloacae complex and its  
314 phylogenetic derivatives in the nosocomial environment. *Eur J Clin Microbiol Infect Dis*  
315 31:2951-5.
- 316 4. Davin-Regli A, Lavigne JP, Pages JM. 2019. Enterobacter spp.: Update on Taxonomy,  
317 Clinical Aspects, and Emerging Antimicrobial Resistance. *Clin Microbiol Rev* 32.
- 318 5. Hoffmann H, Roggenkamp A. 2003. Population genetics of the nomenclature  
319 Enterobacter cloacae. *Appl Environ Microbiol* 69:5306-18.
- 320 6. Tindall BJ, Sutton G, Garrity GM. 2017. Enterobacter aerogenes Hormaeche and  
321 Edwards 1960 (Approved Lists 1980) and Klebsiella mobilis Bascomb et al. 1971  
322 (Approved Lists 1980) share the same nomenclatural type (ATCC 13048) on the  
323 Approved Lists and are homotypic synonyms, with consequences for the name  
324 Klebsiella mobilis Bascomb et al. 1971 (Approved Lists 1980). *Int J Syst Evol Microbiol*  
325 67:502-504.
- 326 7. Sutton GG, Brinkac LM, Clarke TH, Fouts DE. 2018. Enterobacter hormaechei subsp.  
327 hoffmannii subsp. nov., Enterobacter hormaechei subsp. xiangfangensis comb. nov.,  
328 Enterobacter roggenkampii sp. nov., and Enterobacter muelleri is a later heterotypic  
329 synonym of Enterobacter asburiae based on computational analysis of sequenced  
330 Enterobacter genomes. *F1000Res* 7:521.
- 331 8. Wu W, Feng Y, Zong Z. 2019. Characterization of a strain representing a new  
332 Enterobacter species, Enterobacter chengduensis sp. nov. *Antonie Van Leeuwenhoek*  
333 112:491-500.
- 334 9. Singh NK, Bezdán D, Checinska Sielaff A, Wheeler K, Mason CE, Venkateswaran K.  
335 2018. Multi-drug resistant Enterobacter bugandensis species isolated from the  
336 International Space Station and comparative genomic analyses with human pathogenic  
337 strains. *BMC Microbiol* 18:175.
- 338 10. Hoffmann H, Stindl S, Ludwig W, Stumpf A, Mehlen A, Heesemann J, Monget D,  
339 Schleifer KH, Roggenkamp A. 2005. Reassignment of enterobacter dissolvens to  
340 Enterobacter cloacae as E. cloacae subspecies dissolvens comb. nov. and emended  
341 description of Enterobacter asburiae and Enterobacter kobei. *Syst Appl Microbiol*  
342 28:196-205.
- 343 11. Pavlovic M, Konrad R, Iwobi AN, Sing A, Busch U, Huber I. 2012. A dual approach  
344 employing MALDI-TOF MS and real-time PCR for fast species identification within the  
345 Enterobacter cloacae complex. *FEMS Microbiol Lett* 328:46-53.
- 346 12. De Florio L, Riva E, Giona A, Dedej E, Fogolari M, Cella E, Spoto S, Lai A, Zehender G,  
347 Ciccozzi M, Angeletti S. 2018. MALDI-TOF MS Identification and Clustering Applied to  
348 Enterobacter Species in Nosocomial Setting. *Front Microbiol* 9:1885.
- 349 13. Quintelas C, Ferreira EC, Lopes JA, Sousa C. 2018. An Overview of the Evolution of  
350 Infrared Spectroscopy Applied to Bacterial Typing. *Biotechnol J* 13.
- 351 14. Garinet S, Fihman V, Jacquier H, Corvec S, Le Monnier A, Guillard T, Cattoir V, Zahar JR,  
352 Woerther PL, Carbonnelle E, Wargnier A, Kerneis S, Morand PC. 2018. Elective  
353 distribution of resistance to beta-lactams among Enterobacter cloacae genetic  
354 clusters. *J Infect* 77:178-182.

- 355 15. Barnes AI, Paraje MG, del CBP, Albesa I. 2001. Molecular properties and metabolic  
356 effect on blood cells produced by a new toxin of *Enterobacter cloacae*. *Cell Biol Toxicol*  
357 17:409-18.
- 358 16. Paauw A, Caspers MPM, Leverstein-van Hall MA, Schuren FHJ, Montijn RC, Verhoef J,  
359 Fluit AC. 2009. Identification of resistance and virulence factors in an epidemic  
360 *Enterobacter hormaechei* outbreak strain. *Microbiology (Reading)* 155:1478-1488.
- 361 17. Mateos M, Hernandez-Garcia M, Del Campo R, Martinez-Garcia L, Gijon D, Morosini  
362 MI, Ruiz-Garbajosa P, Canton R. 2020. Emergence and Persistence over Time of  
363 Carbapenemase-Producing *Enterobacter* Isolates in a Spanish University Hospital in  
364 Madrid, Spain (2005-2018). *Microb Drug Resist*.
- 365 18. Wang YQ, Xiao D, Li J, Zhang HF, Fu BQ, Wang XL, Ai XM, Xiong YW, Zhang JZ, Ye CY.  
366 2018. Rapid Identification and Subtyping of *Enterobacter cloacae* Clinical Isolates Using  
367 Peptide Mass Fingerprinting. *Biomed Environ Sci* 31:48-56.
- 368 19. Godmer A, Benzerara Y, Normand AC, Veziris N, Gallah S, Eckert C, Morand P, Piarroux  
369 R, Aubry A. 2021. Revisiting Species Identification within the *Enterobacter cloacae*  
370 Complex by Matrix-Assisted Laser Desorption Ionization-Time of Flight Mass  
371 Spectrometry. *Microbiol Spectr* 9:e0066121.
- 372 20. Vogt S, Loffler K, Dinkelacker AG, Bader B, Autenrieth IB, Peter S, Liese J. 2019. Fourier-  
373 Transform Infrared (FTIR) Spectroscopy for Typing of Clinical *Enterobacter cloacae*  
374 Complex Isolates. *Front Microbiol* 10:2582.

375

376

377

378

379

380

381

382

383

384

385

386

387

388 **Table 1.** Number of isolates of each species used for model creation and validation for  
 389 MALDI-TOF MS and FTIR S.

| Species included in the study | Number of strains used for model development | Number of strains used for external validation |
|-------------------------------|----------------------------------------------|------------------------------------------------|
| <i>K. aerogenes</i>           | 6                                            | 3                                              |
| <i>E. asburiae</i>            | 6                                            | 1                                              |
| <i>E. dissolvens</i>          | 1                                            | 0                                              |
| <i>E. hormaechei</i> III      | 6                                            | 13                                             |
| <i>E. hormaechei</i> VI       | 6                                            | 22                                             |
| <i>E. hormaechei</i> VIII     | 6                                            | 16                                             |
| <i>E. kobei</i>               | 6                                            | 9                                              |
| <i>E. ludwigii</i>            | 3                                            | 0                                              |
| <i>E. roggenkampii</i>        | 7                                            | 62                                             |
| <b>Total</b>                  | <b>47</b>                                    | <b>126</b>                                     |

390

391

392 **Table 2.** Internal and external validation for Model A and Model B in all algorithms used  
 393 for MALDI-TOF MS spectra.

| Algorithm     | Model A             |                     | Model B             |                     |
|---------------|---------------------|---------------------|---------------------|---------------------|
|               | Internal validation | External validation | Internal validation | External validation |
| <b>PLS-DA</b> | 91.5%               | 70.6%               | 77.8%               | NR                  |
| <b>SVM</b>    | 91.5%               | 92.1%               | 94.4%               | 94.1%               |
| <b>RF</b>     | 95.7%               | 96.0%               | 94.4%               | 80.4%               |

PLS-DA, Partial Least Square Discriminant Analysis; SVM, Support Vector Machine; RF, Random Forest; NR, Not Realized

394

395

396

397

398

399



400

401 **Table 3.** Internal and external validation for Model A and B for all algorithms used for  
402 FTIR-S spectra.

| Algorithm | Model A             |                     | Model B             |                     |
|-----------|---------------------|---------------------|---------------------|---------------------|
|           | Internal validation | External validation | Internal validation | External validation |
| SVM       | 95.1%               | 69.8%               | 99.2%               | 72.5%               |
| RF        | 98.5%               | 73.0%               | 100%                | 72.5%               |

403

404

405

406

407

408

409

410 **Table 4.** Internal and external validation for new FTIR-S models.

| Algorithm | Model C             |                     | Model D             |                     |
|-----------|---------------------|---------------------|---------------------|---------------------|
|           | Internal validation | External validation | Internal validation | External validation |
| SVM       | 96.7%               | 88.1%               | 95.1%               | 56.0%               |
| RF        | 99.1%               | 87.3%               | 99.0%               | 62.7%               |

411

412

413

414

415

416

417

418

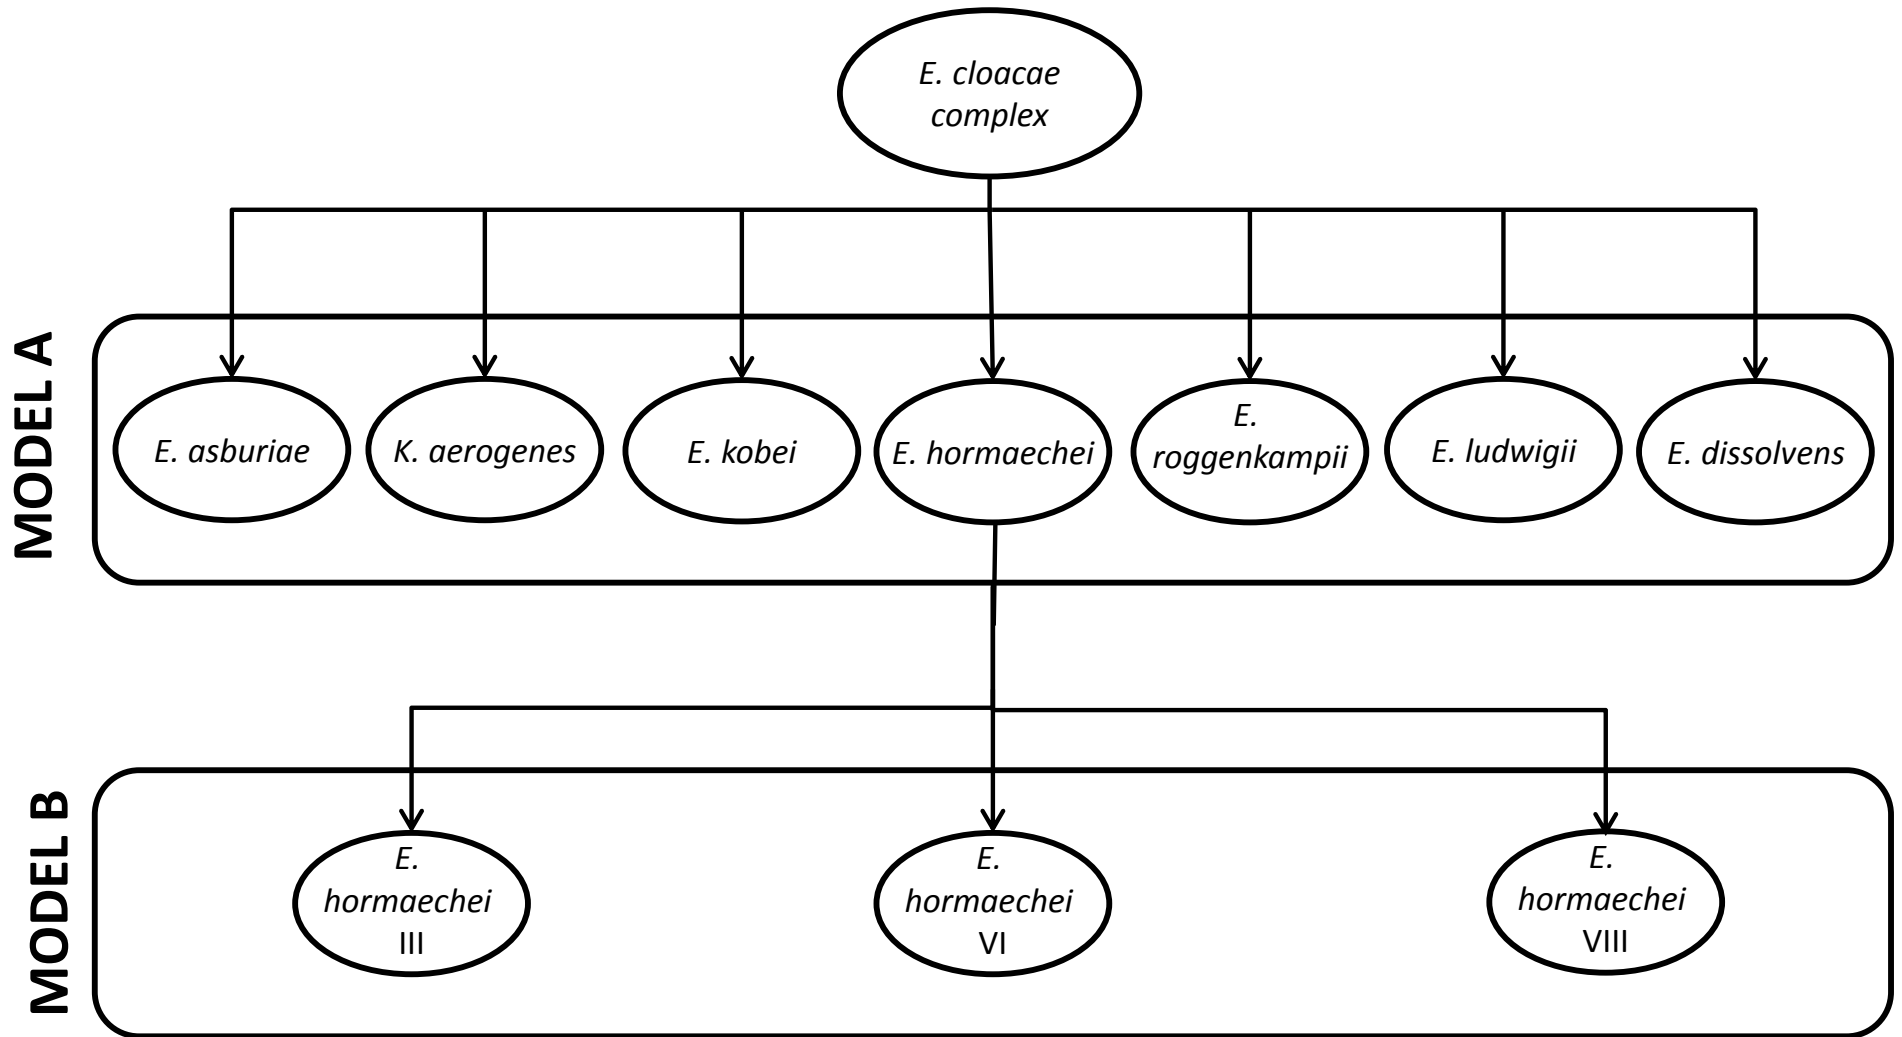

**Figure 1.** *E. cloacae* complex identification algorithm according to models developed.

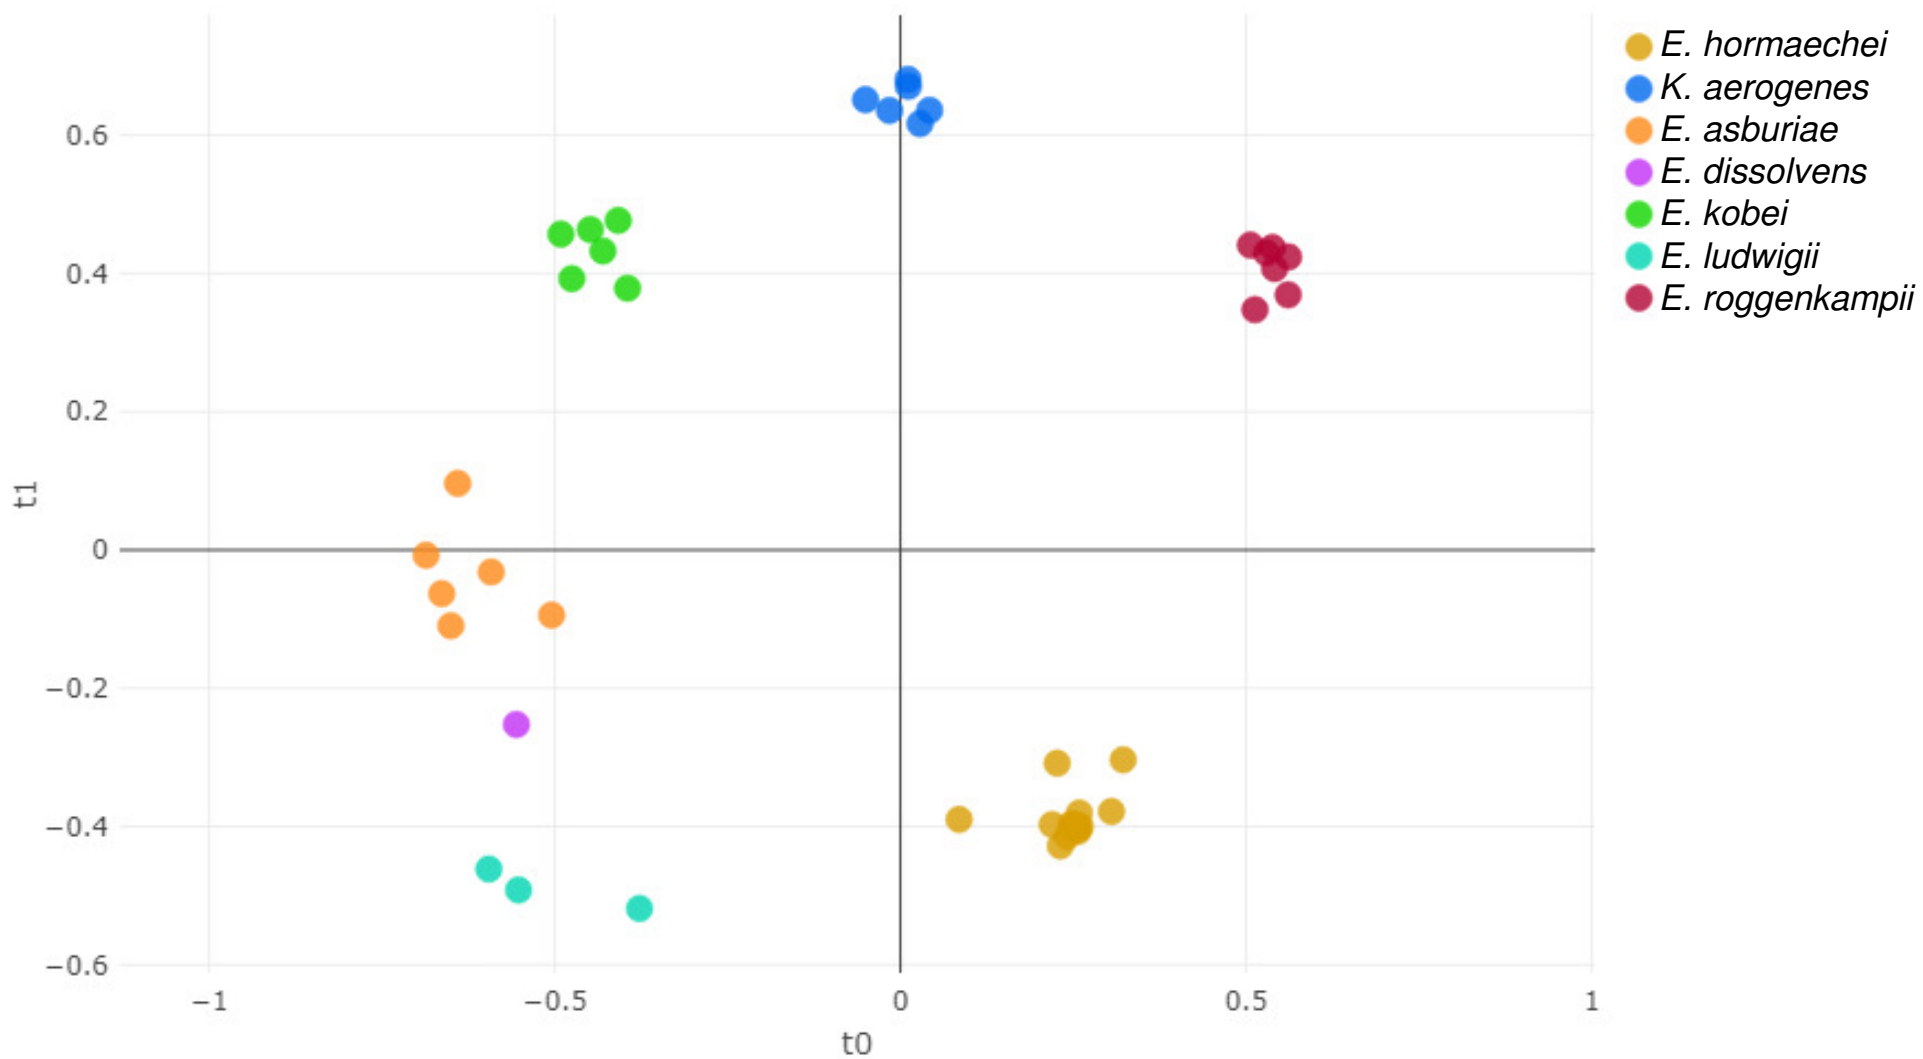

**Figure 2.** MALDI-TOF MS spectra in Random Forest distance plot for Model A.

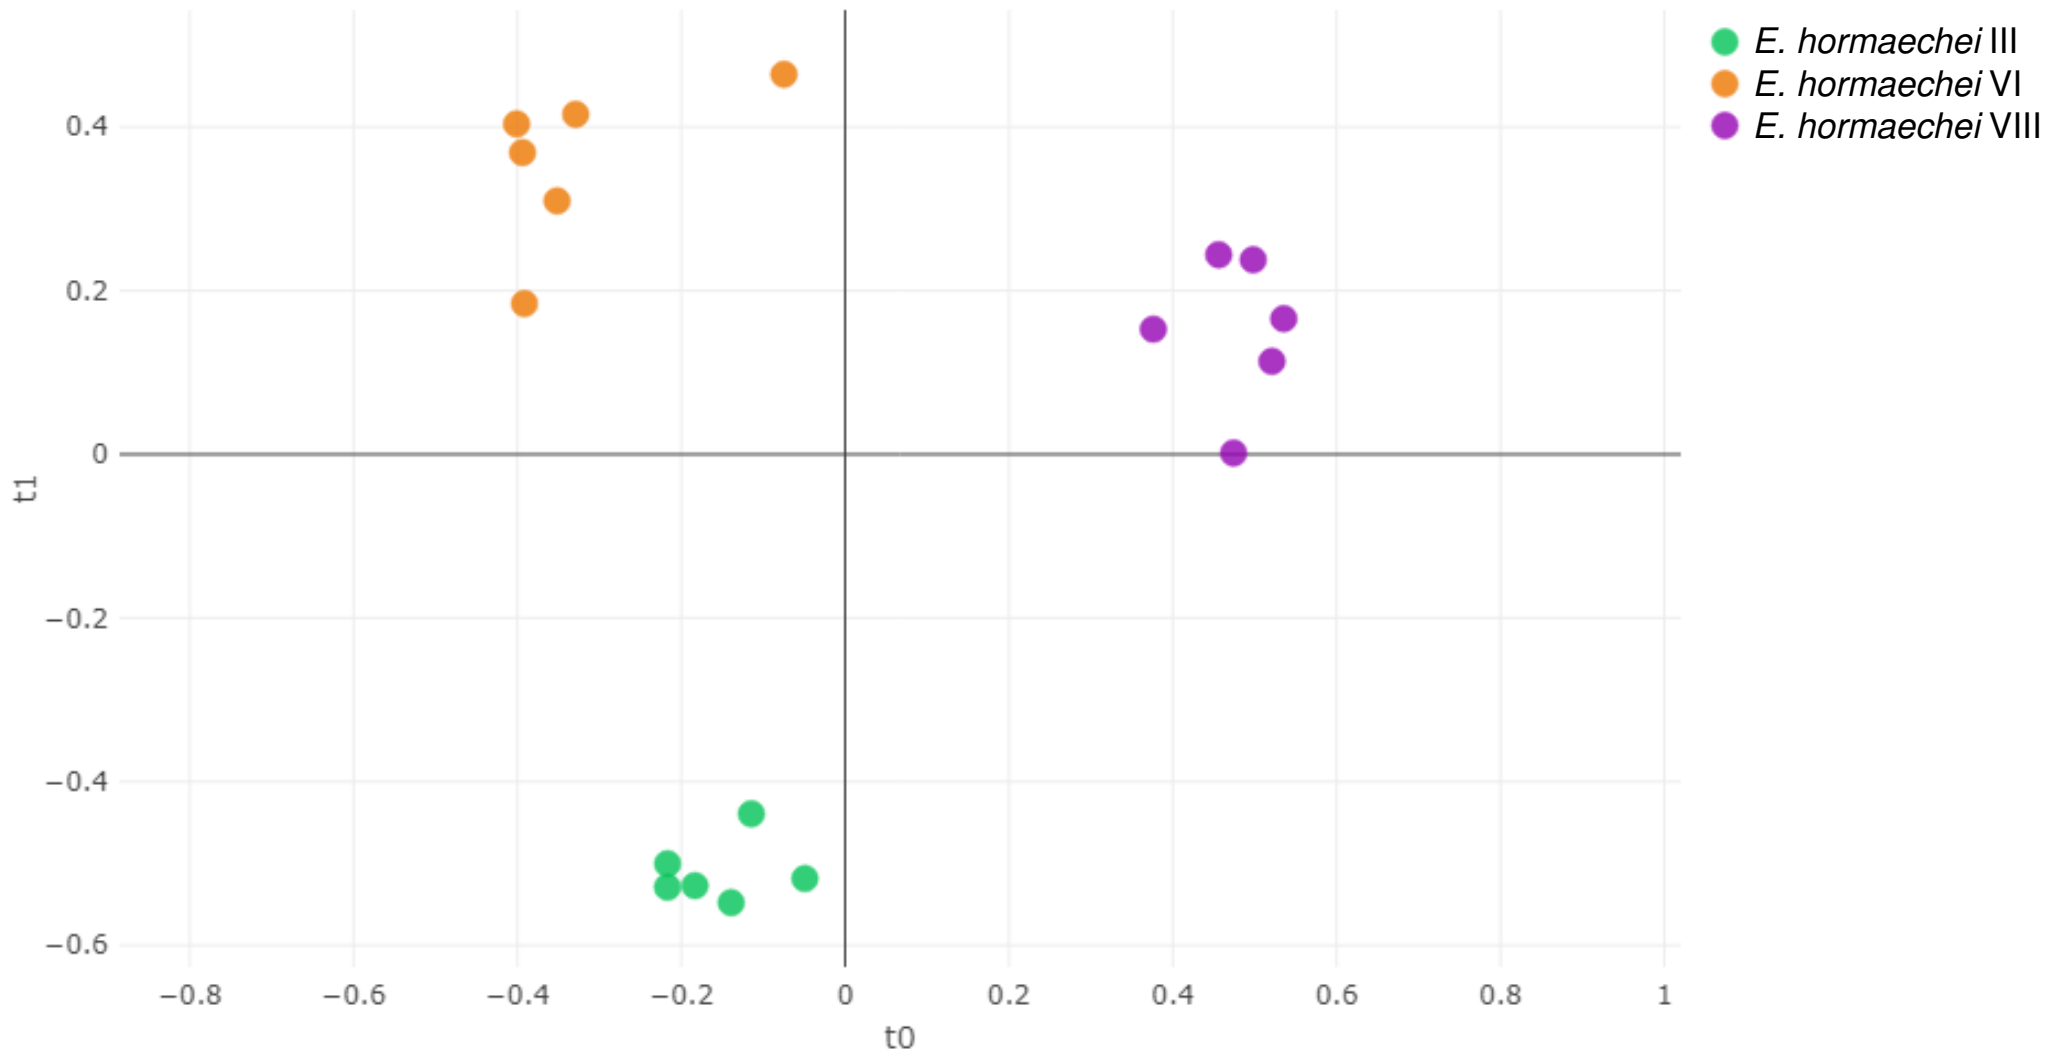

**Figure 3.** MALDI-TOF MS spectra in Random Forest distance plot for Model B.
